# Supplementary material for: Defects in efferent duct multiciliogenesis underlie male infertility in GEMC1, MCIDAS or CCNO deficient mice
Source: Oxford University Press journal article supplement (doi:10.1242/dev.162628), 2019-01-01
Supplement: dev162628supp.pdf [file dev162628supp.pdf]

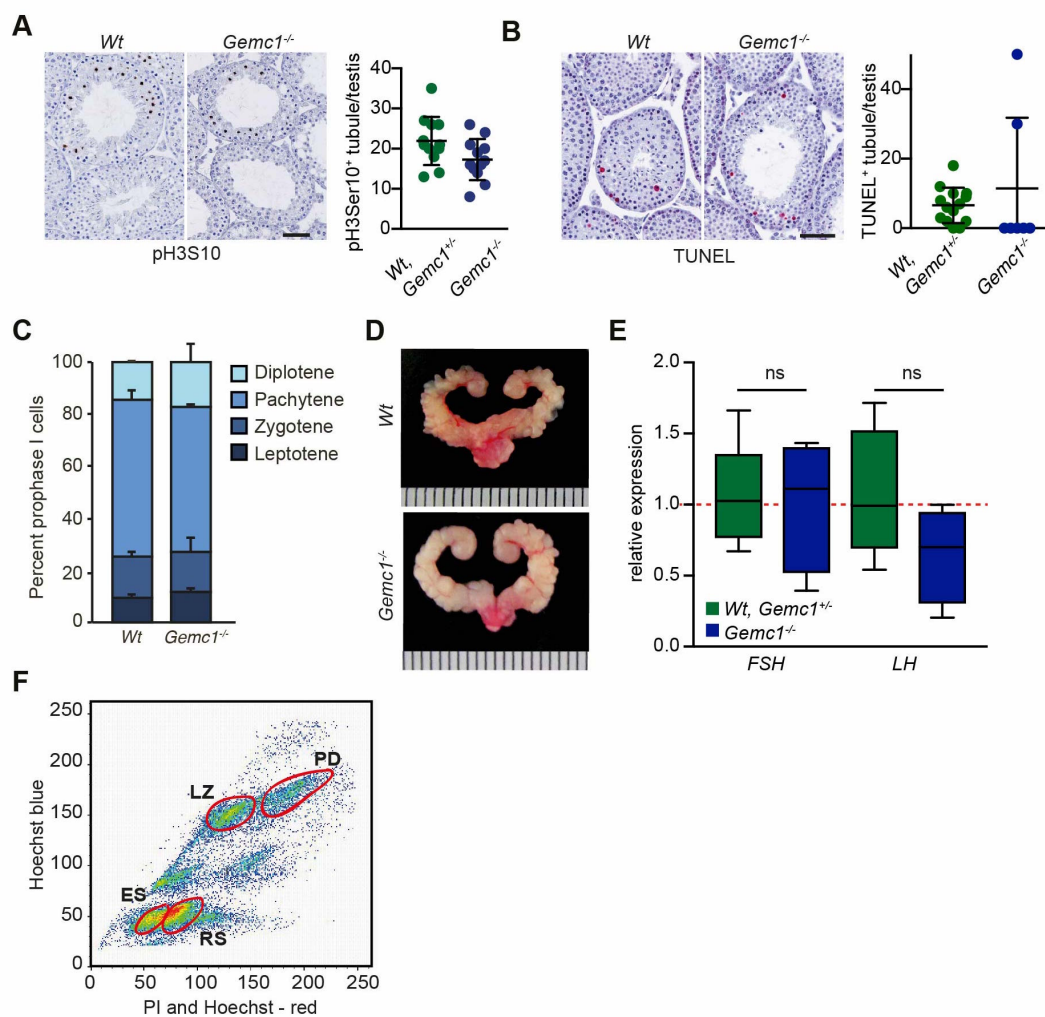

**Figure S1. Characterization of *Gemc1*<sup>-/-</sup> testes.** (A) Representative (p35) H3-S10 (mitotic marker) staining of the seminiferous tubules of the indicated genotypes. Scale bars=50 $\mu$ m. Quantification is shown (n=4 for *Wt/Gemc1*<sup>+/+</sup>, n=7 animals for *Gemc1*<sup>-/-</sup>). (B) Representative (p27) TUNEL (cell death marker) staining of the seminiferous tubules of the indicated genotypes. Scale bars=50 $\mu$ m. Quantification is shown (n $\geq$ 2 animals per genotype, all tubules scored from 2 sections per animal). (C) Quantification of prophase I stages in meiotic cells of the indicated genotype based on SCP1 and SCP3 co-staining from spermatocyte spreads of two month old mice (n=2 animals per genotype, *Wt* n=252 and 502, *Gemc1*<sup>-/-</sup> n=248 and 286 cells scored, respectively). (D) Dissected seminal vesicles, which are highly sensitive to perturbed hormonal levels, from mice of the indicated genotype appeared similar in size. Ruler=mm. (E) RT-PCR of mRNA levels of *FSH* and *LH* in the pituitary gland of mice of the indicated genotypes (n=5 and 4 animals, respectively). *ACTB*

and *GAPDH* were used as normalization controls. Statistical analysis performed using an unpaired t-test, two-tailed. (F) A representative plot of the sorting strategy used to isolate cells at different stages of spermatogenesis from the testes. LZ=leptotene, zygotene, PD=pachytene, diplotene, RS=round spermatids and ES=elongated spermatids.

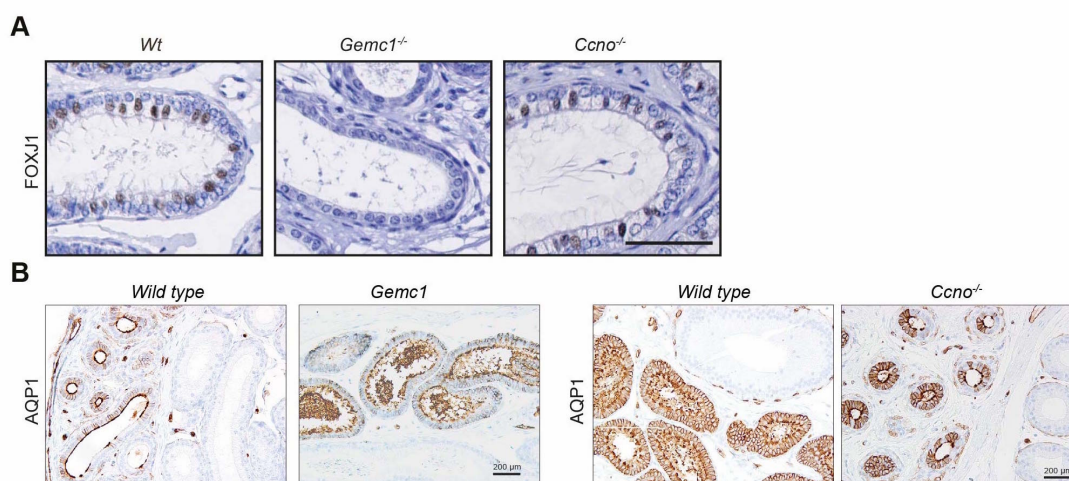

**Figure S2. Characterization of the efferent ducts.** (A) Representative (p35) staining of the efferent ducts for the FOXJ1 transcription factor. Scale bars=50μm. (B) Representative staining for AQP1 in the efferent ducts of the indicated genotypes. Scale bar=200μm.

### Table S1

Additional antibodies used in experiments performed as described in the materials and methods of the main text.

| Antigen  | Species | Vendor           | Clone       | Reference no. | Dilution |
|----------|---------|------------------|-------------|---------------|----------|
| SCP3     | mouse   | abcam            | Cor 10G11/7 | ab97672       | 1:500    |
| SCP1     | rabbit  | abcam            |             | ab15087       | 1:500    |
| γH2AX    | mouse   | Millipore        | JBW301      | 05-636        | 1:500    |
| pH3Ser10 | Rabbit  | Millipore        |             | 05-598        | 1:500    |
| AQP1     | rabbit  | EMD<br>Millipore |             | AB2219        | 1:1000   |
| FOXJ1    | mouse   | eBioscience      | 2A5         | 14-9965-83    | 1:500    |

## Table S2

Additional primers used in QRT-PCR performed as described in the materials and methods of the main text.

| Oligo           | Sequence (5'-3')       |
|-----------------|------------------------|
| <i>mFSH_FW</i>  | CAGTAGAGAAGGAAGAGTGCCG |
| <i>mFSH_RV</i>  | CGGTCTCGTATACCAGCTCC   |
| <i>mLH_FW</i>   | GCCGGCCTGTCAACGCAACT   |
| <i>mLH_RV</i>   | TGGGGTCTACACCCGGTGGG   |
| <i>mActB_FW</i> | GGCTGTATTCCCCTCCATCG   |
| <i>mActB_RV</i> | CCAGTTGGTAACAATGCCATGT |
